# Supplementary material for: Computational Tool to Design Small Synthetic Inhibitors Selective for XIAP-BIR3 Domain
Source: MDPI journal article supplement (doi:10.3390/molecules28135155), 2023-06-30
Supplement: s1 [file s1]

# **Computational tool to design non peptidomimetic antagonists selectives for XIAP BIR3 domain**

**Marc Farag <sup>1</sup>, Charline Kieffer <sup>1</sup>, Nicolas Guedeney <sup>1</sup> Anne Sophie Voisin-Chiret <sup>1</sup> and Jana Sopkova-de Oliveira Santos <sup>1,\*</sup>**

<sup>1</sup> Normandie Univ, Unicaen, Cermn, 14000 Caen, France; marc.ragui@unicaen.fr (M.F.); anne-sophie.voisin@unicaen.fr (AVC.); charline.kieffer@unicaen.fr (C.K.); jana.sopkova@unicaen.fr (J.S.)

\* Correspondence: jana.sopkova@unicaen.fr; Tel.: +33231566821

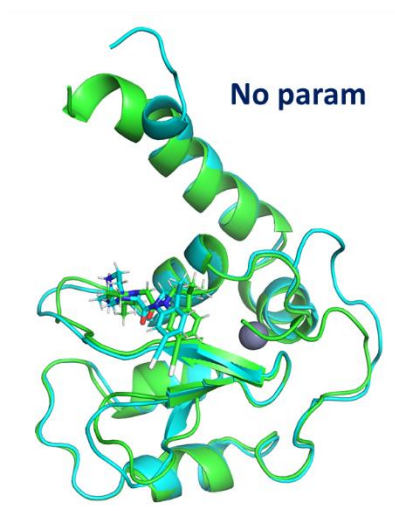

5C7C

● Start

● End

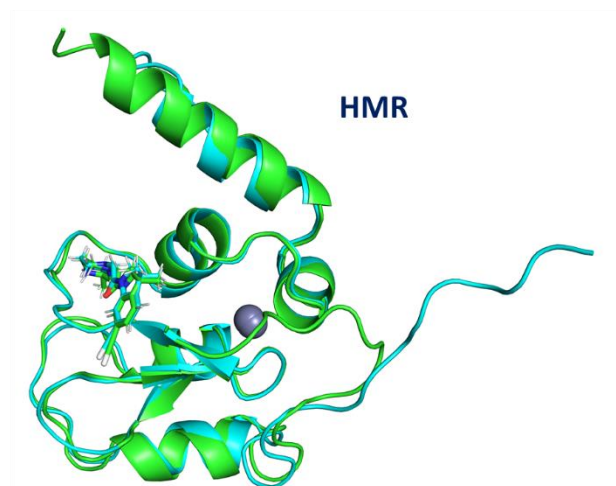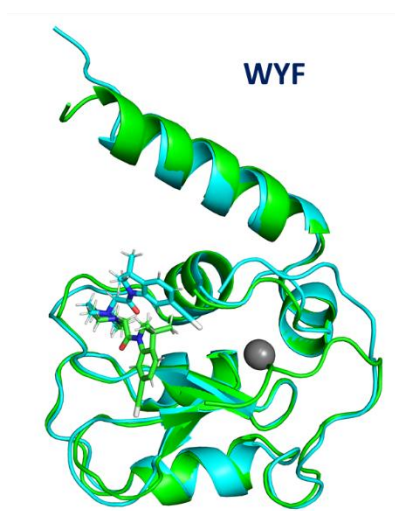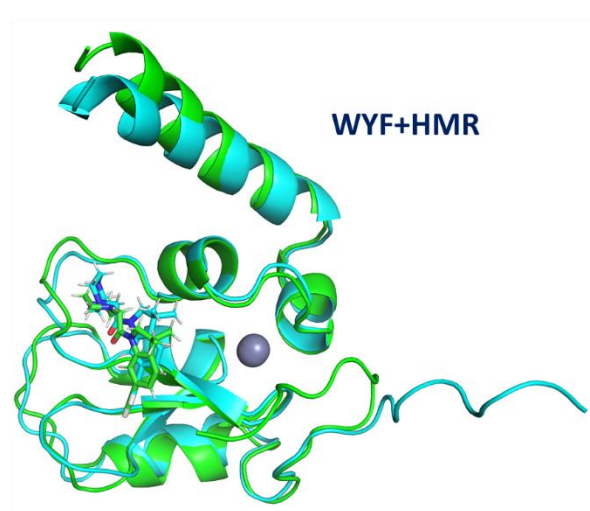

## 50QW

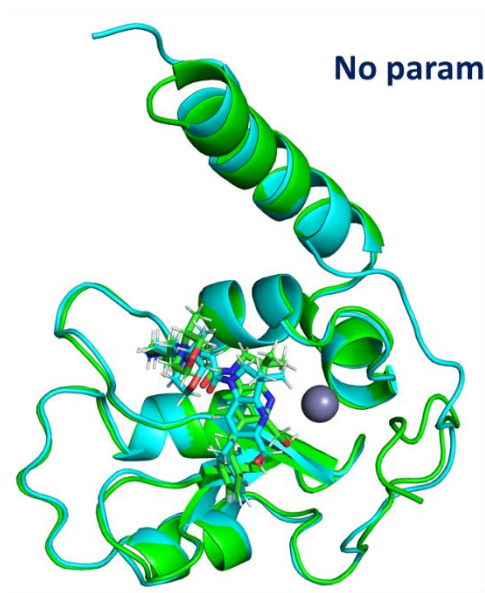

- Start
- End

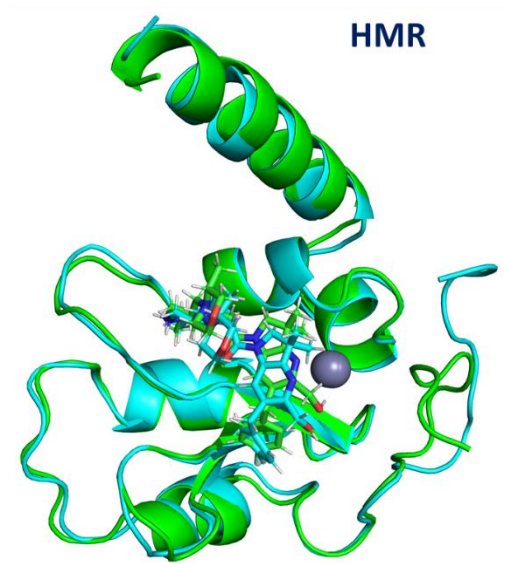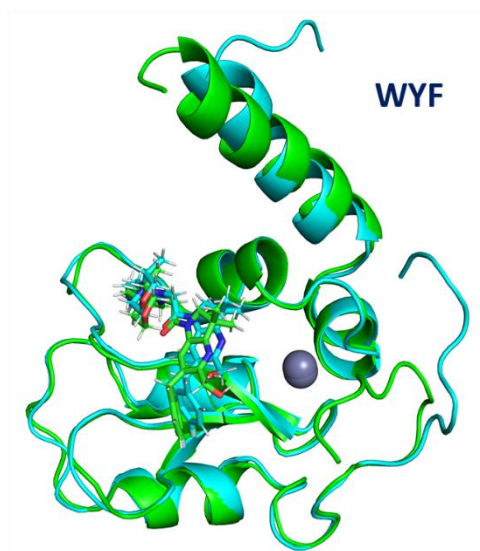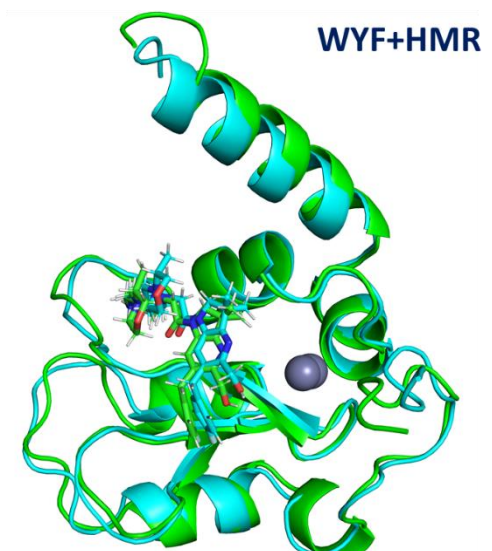

## 5M6M

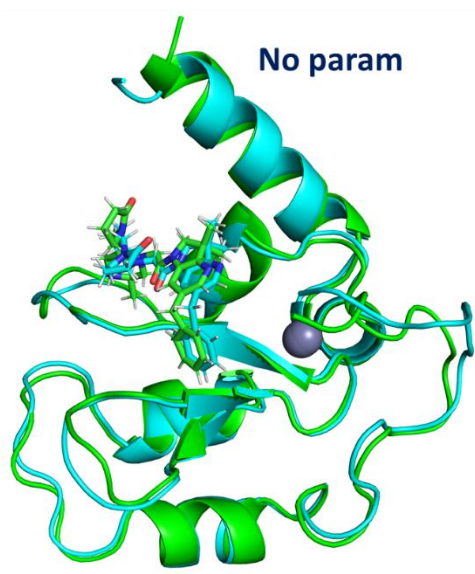

- Start
- End

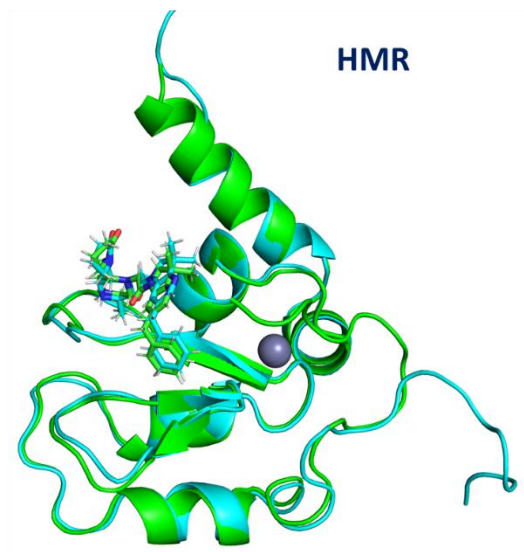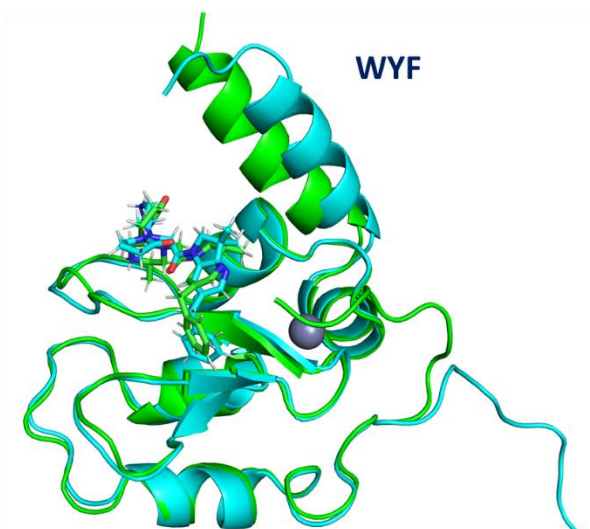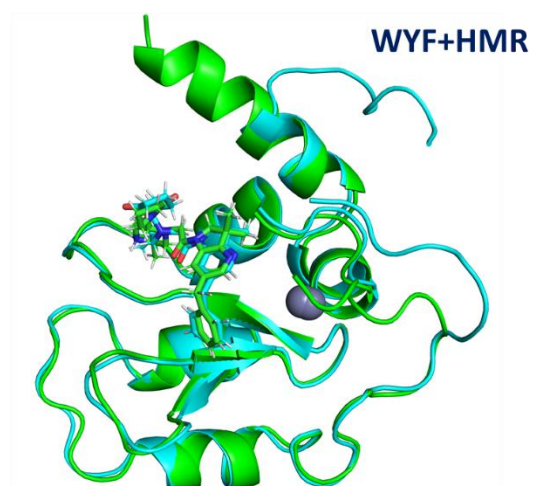

## 5M6L

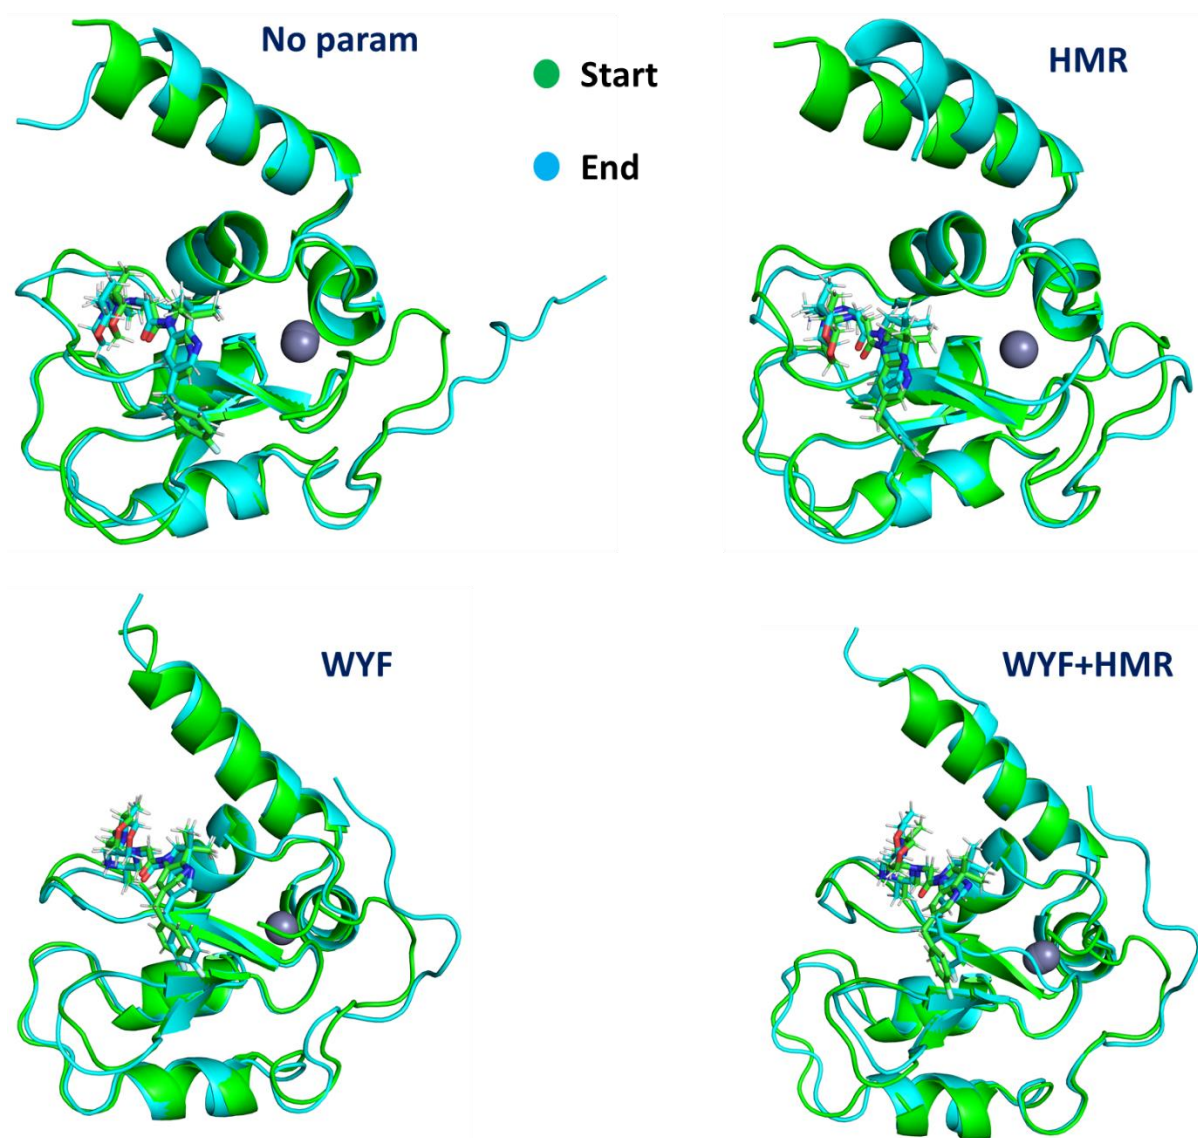

**Figure S1:** The alignment of the end structure from molecular dynamics simulation on the initial one for four studied complexes with synthetic ligands.



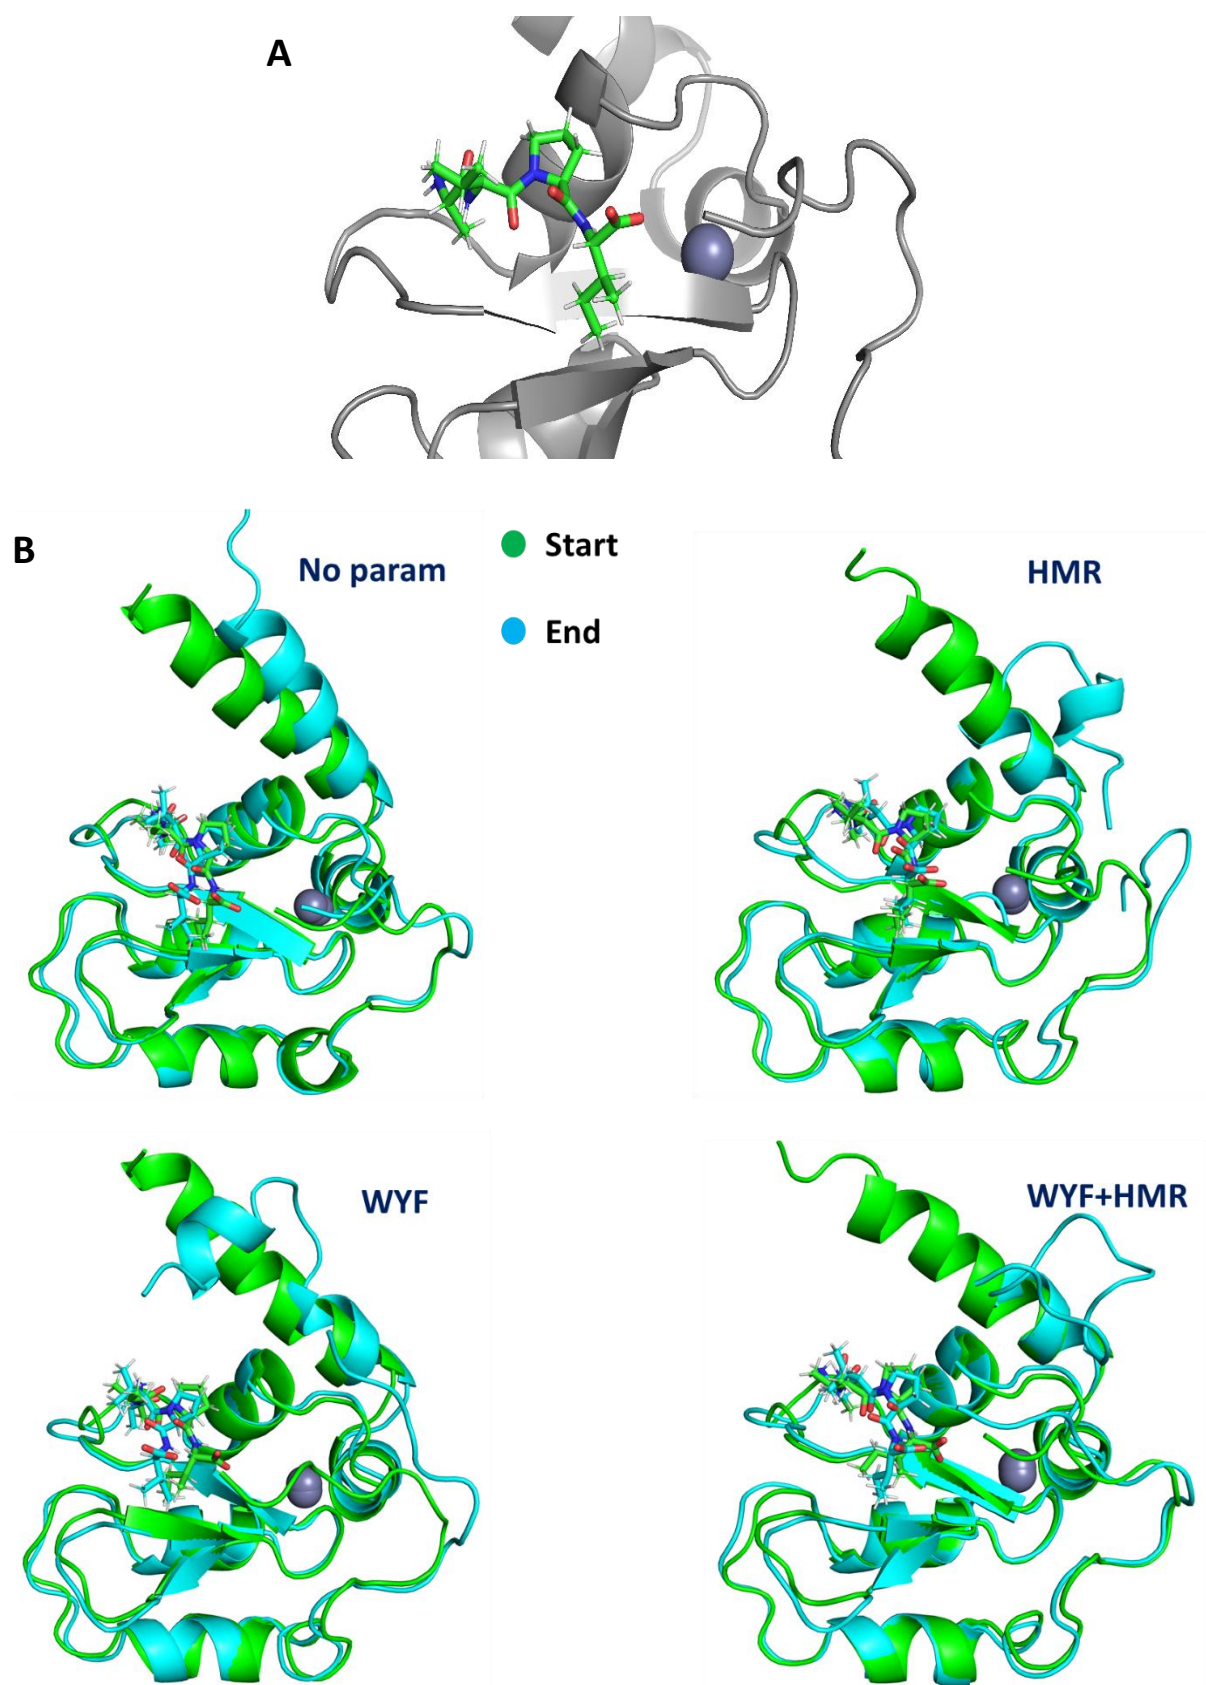

**Figure S2:** (A) Selected pose from docking for AVPI into 5C7C structure (B) The alignment of the end structure from molecular dynamics simulation on the initial one for four studied complexes with synthetic ligands.

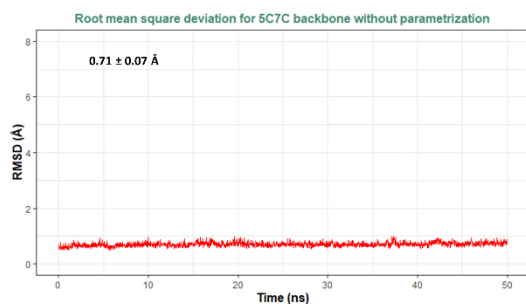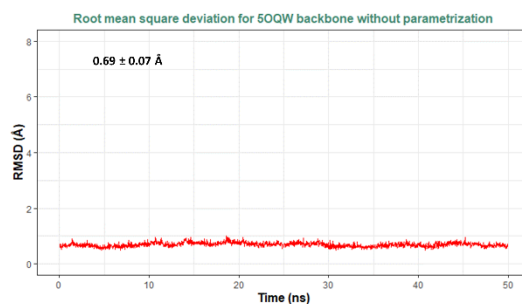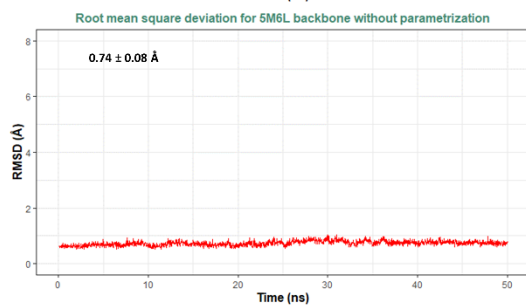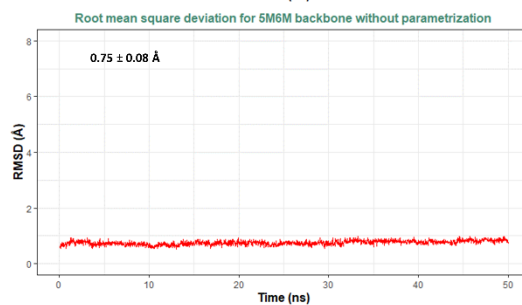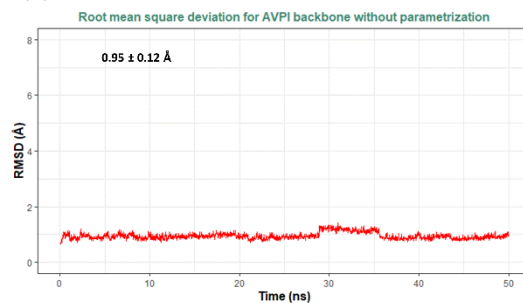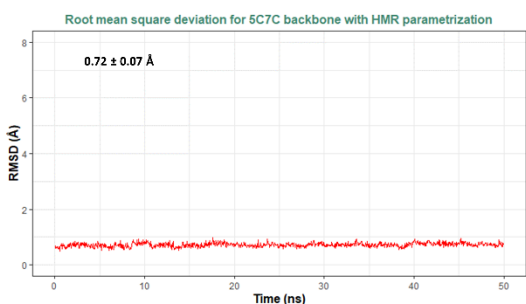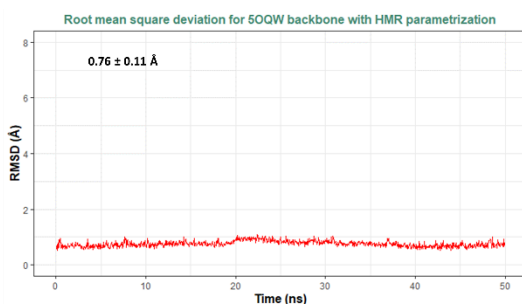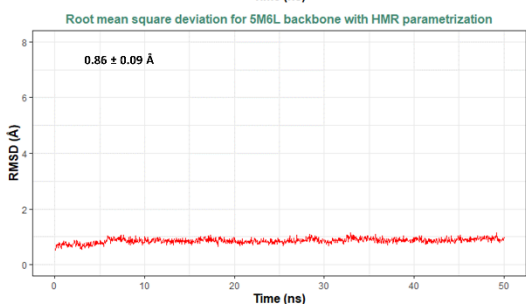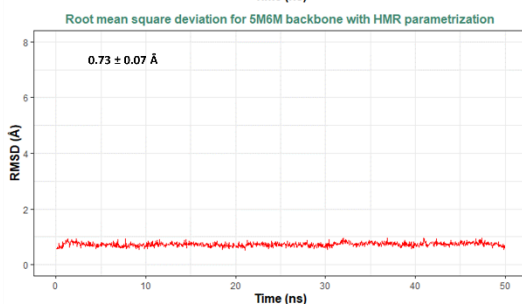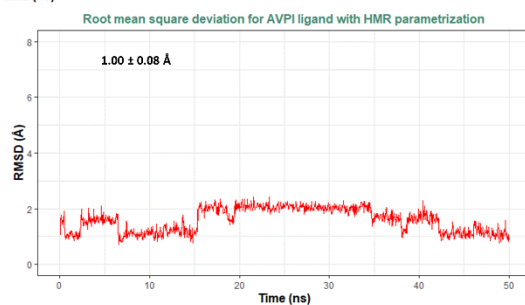

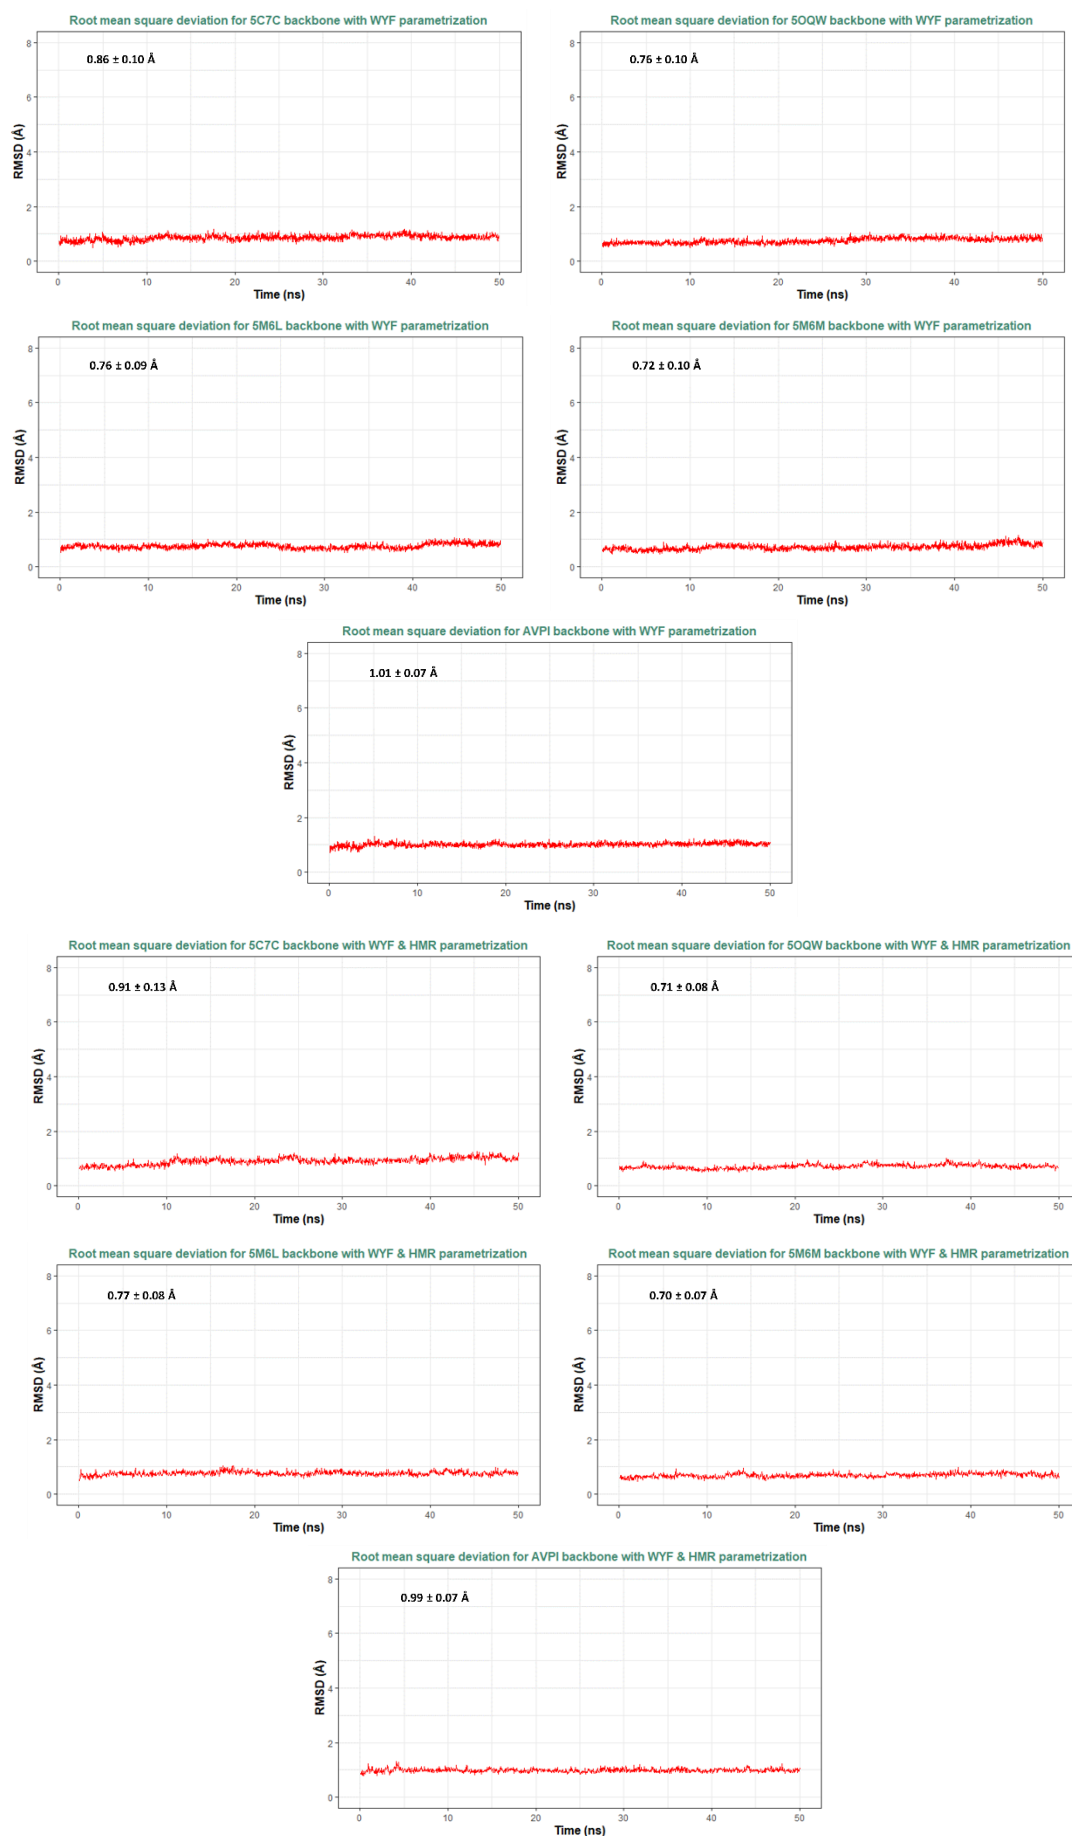

**Figure S3:** The RMSD of the protein backbone atoms along the MD simulations. The conformations were aligned excluding the C and N-terminal helices. The RMSDs were calculated only on the XIAP-BIR3 core (without N and C termini).



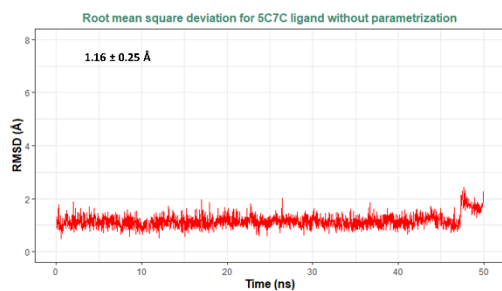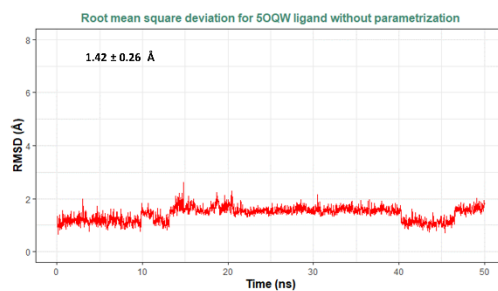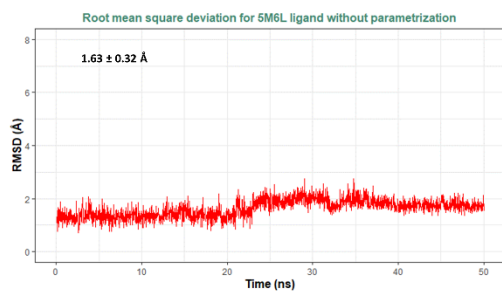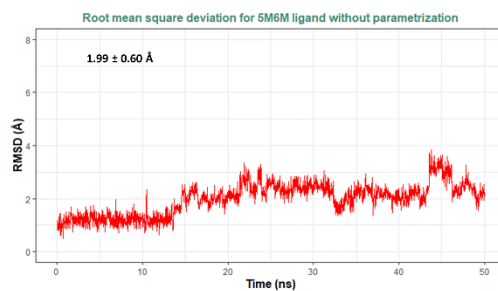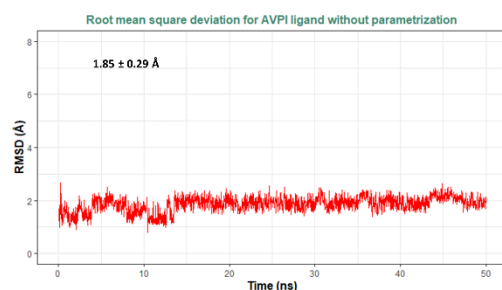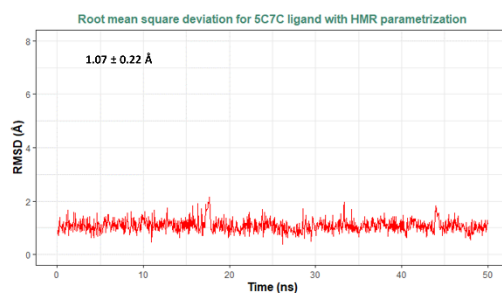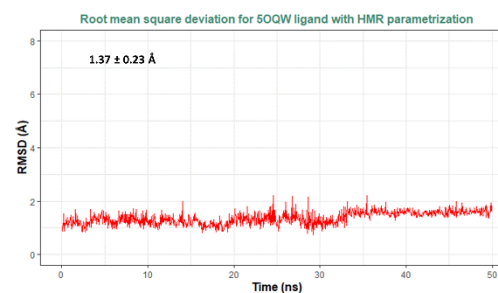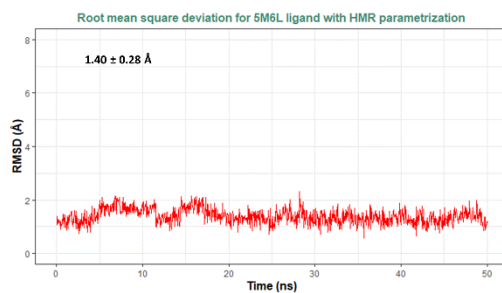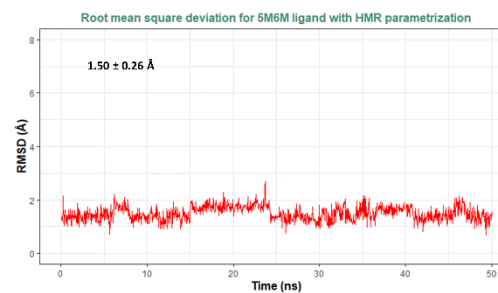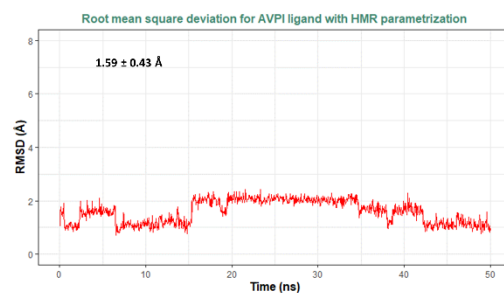

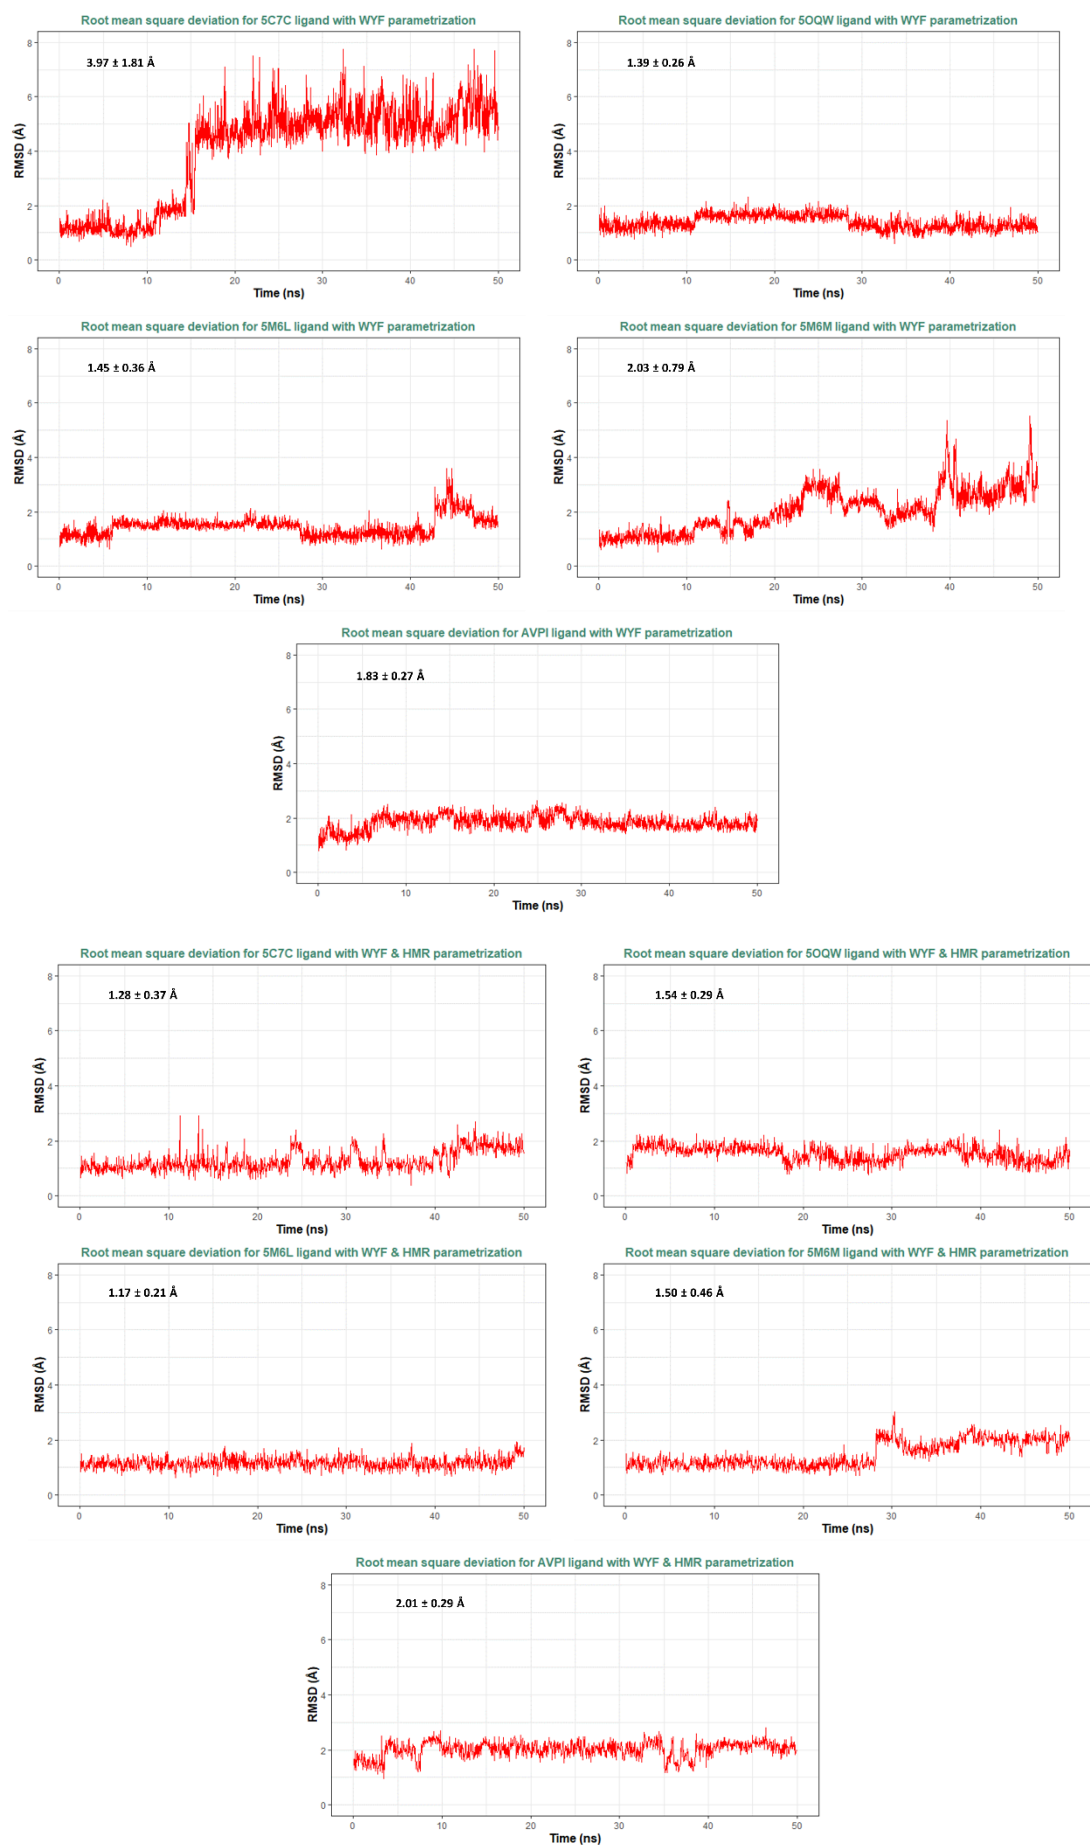

**Figure S4:** The RMSD of the ligands along the MD simulations. The complexes generated from trajectories were aligned using the protein backbone atoms excluding the C and N-terminal helices.

## 50QW

### Interaction

- TYR.324\_A4E
- TRP.323\_A4E
- GLN.319\_A4E
- GLU.314\_A4E
- LYS.311\_A4E
- TRP.310\_A4E
- ASP.309\_A4E
- THR.308\_A4E
- LEU.307\_A4E
- GLY.306\_A4E
- LYS.299\_A4E
- VAL.298\_A4E
- LYS.297\_A4E
- LEU.292\_A4E

No param

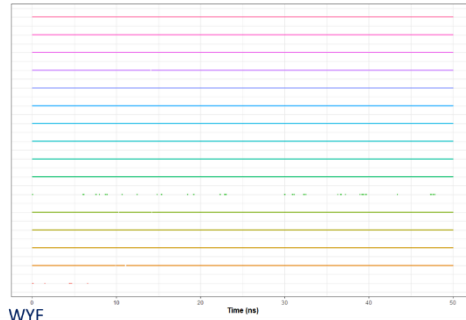

HMR

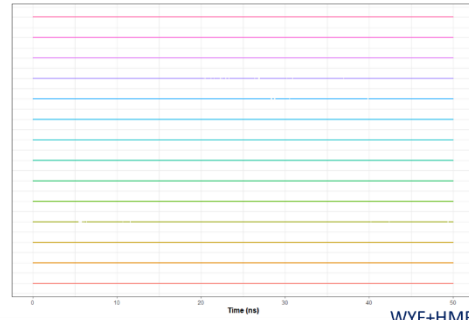

WYF

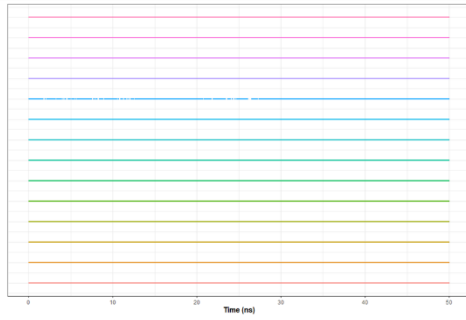

WYF+HMR

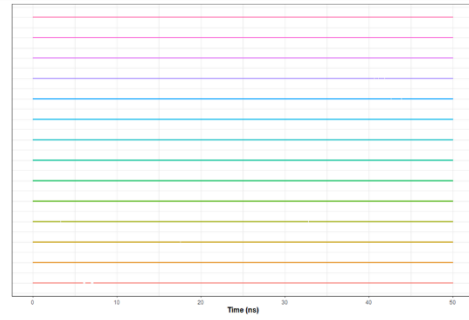

## 5C7C

### Interaction

- TYR.324\_4YC
- TRP.323\_4YC
- GLN.319\_4YC
- GLU.314\_4YC
- LYS.311\_4YC
- TRP.310\_4YC
- ASP.309\_4YC
- THR.308\_4YC
- LEU.307\_4YC
- GLY.306\_4YC
- LYS.297\_4YC
- MET.248\_4YC

No param

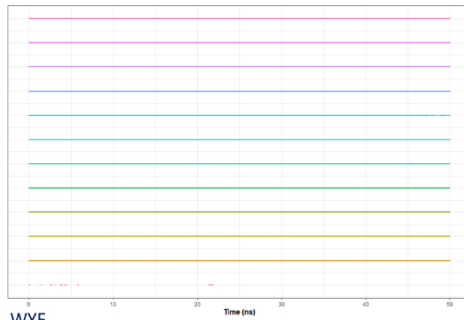

HMR

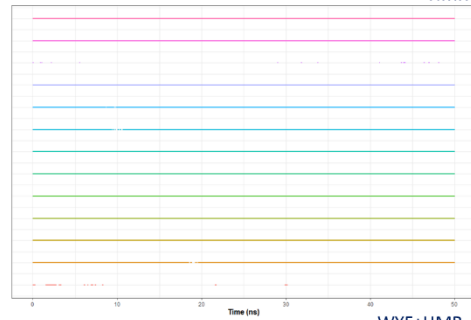

WYF

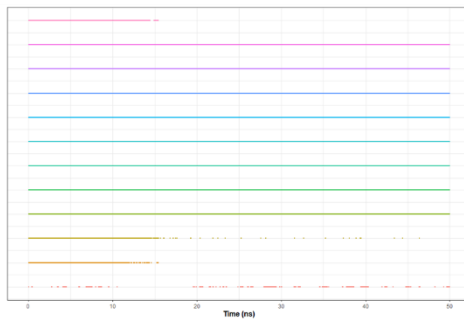

WYF+HMR

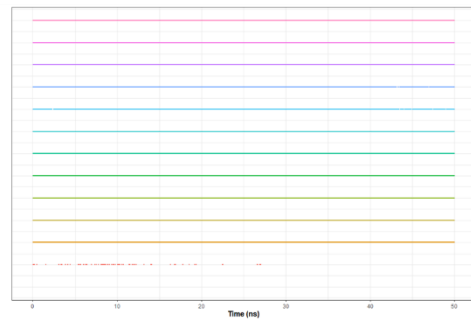

## 5M6M

### Interaction

- TYR.324\_7H8
- TRP.323\_7H8
- GLN.319\_7H8
- GLU.314\_7H8
- LYS.311\_7H8
- TRP.310\_7H8
- ASP.309\_7H8
- THR.308\_7H8
- LEU.307\_7H8
- GLY.306\_7H8
- LYS.299\_7H8
- VAL.298\_7H8
- LYS.297\_7H8
- LEU.292\_7H8

No param

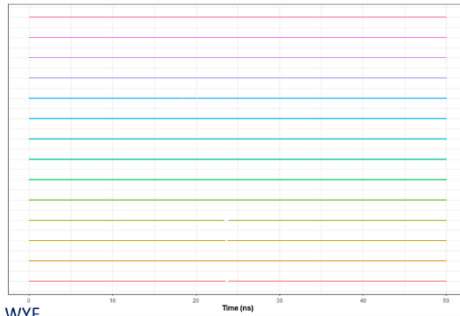

HMR

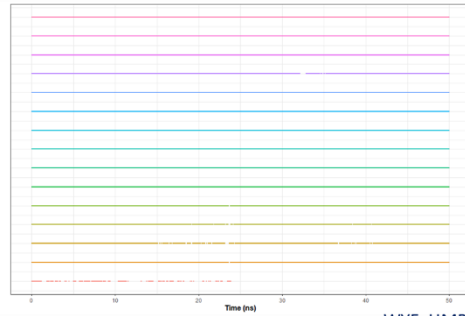

WYF

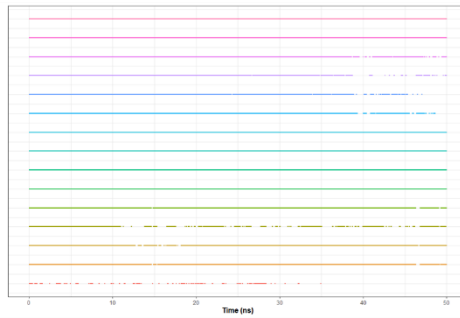

WYF+HMR

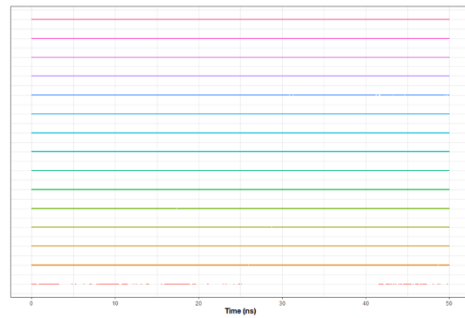

## 5M6L

### Interaction

- TYR.324\_7H9
- TRP.323\_7H9
- GLN.319\_7H9
- GLU.314\_7H9
- LYS.311\_7H9
- TRP.310\_7H9
- ASP.309\_7H9
- THR.308\_7H9
- LEU.307\_7H9
- GLY.306\_7H9
- LYS.299\_7H9
- VAL.298\_7H9
- LYS.297\_7H9
- LEU.292\_7H9
- MET.248\_7H9

No param

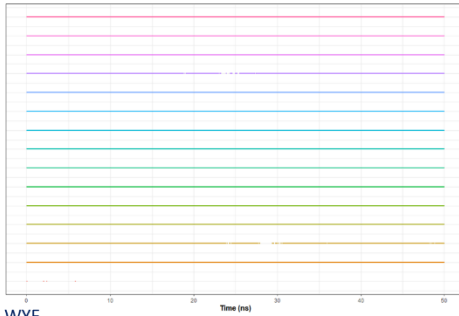

HMR

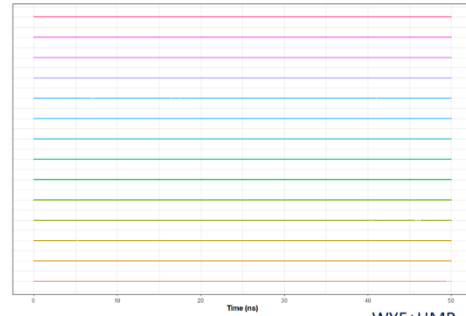

WYF

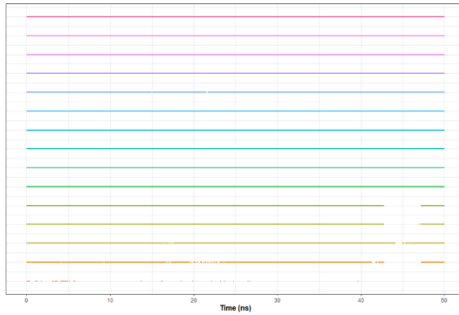

WYF+HMR

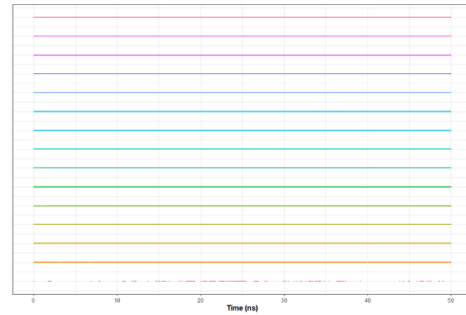

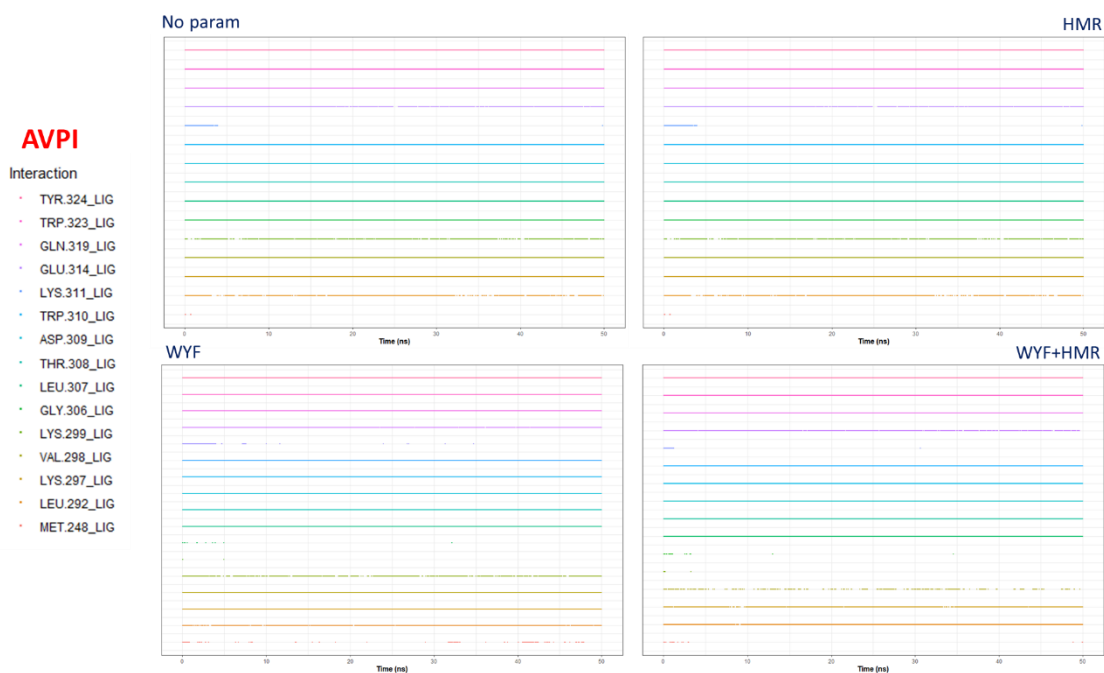

**Figure S5:** Key interacting residues of XIAP-BIR3 with ligands and their dynamical evolution along MD trajectories for all simulated complexes.

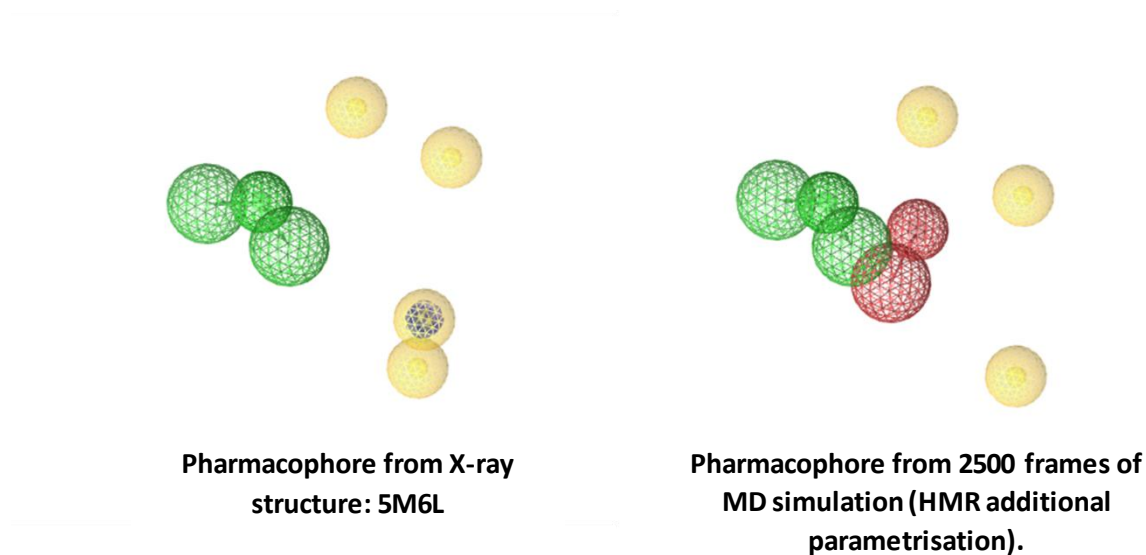

**Figure S6:** Two pharmacophores used to create the final pharmacophore. On the left, the one generated from 5M6L complex X-ray structure. On the right, the one generated from the 2500 frames of molecular dynamics simulations.



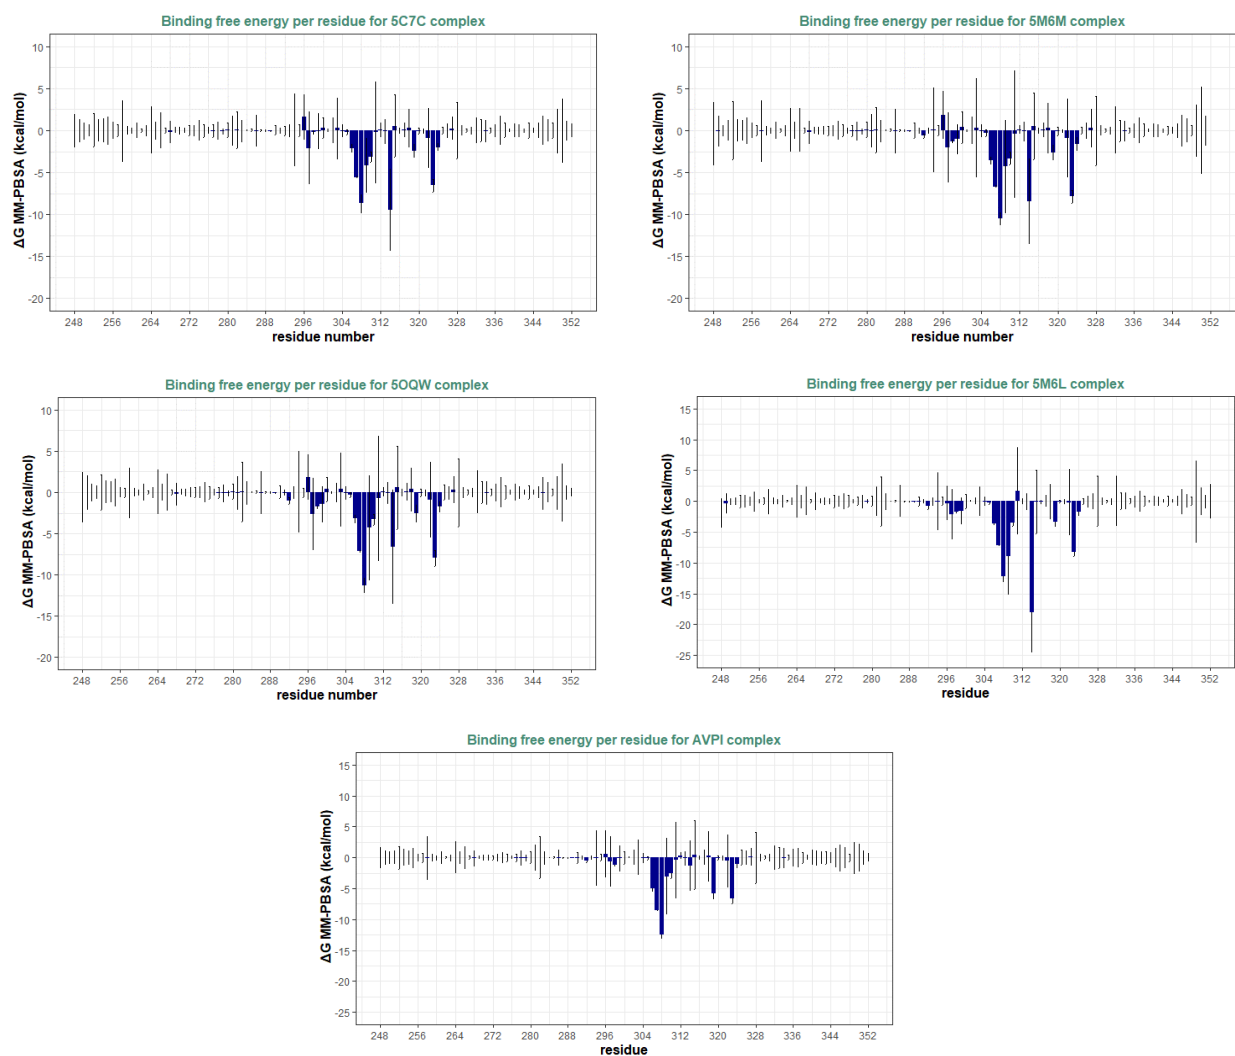

**Figure S7:**  $\Delta G_{MM-PBSA}$  per residue without entropic term for the five studied complexes.

**Table S1:** Experimental binding free energy  $\Delta G_{\text{exp}}$  and calculated ones using the MM-PBSA method  $\Delta G_{\text{MM-PBSA}}$  for different parametrisations of the force field.

a) without entropic term

10 ns

|      | $\Delta G_{\text{exp}}$<br>[kcal/mol] | $\Delta G_{\text{MM-PBSA}}$ [kcal/mol] |                 |                 |                 |
|------|---------------------------------------|----------------------------------------|-----------------|-----------------|-----------------|
|      |                                       | Without additional<br>parametrisation  | HMR             | WYF             | HMR + WYF       |
| 5C7C | -7.29                                 | $-36.8 \pm 3.0$                        | $-37.5 \pm 4.7$ | $-37.4 \pm 3.5$ | $-35.3 \pm 3.8$ |
| 5M6M | -10.20                                | $-44.4 \pm 4.3$                        | $-44.8 \pm 3.6$ | $-44.9 \pm 3.8$ | $-44.0 \pm 4.2$ |
| 5OQW | -10.26                                | $-48.6 \pm 4.0$                        | $-46.3 \pm 4.0$ | $-47.2 \pm 3.7$ | $-47.3 \pm 3.9$ |
| 5M6L | -11.49                                | $-44.9 \pm 4.0$                        | $-44.8 \pm 4.2$ | $-47.3 \pm 3.6$ | $-47.0 \pm 3.0$ |
| AVPI | -8.91                                 | $-46.9 \pm 5.3$                        | $-44.0 \pm 7.9$ | $-48.0 \pm 5.2$ | $-40.0 \pm 8.3$ |

25 ns

|      | $\Delta G_{\text{exp}}$<br>[kcal/mol] | $\Delta G_{\text{MM-PBSA}}$ [kcal/mol] |                 |                 |                 |
|------|---------------------------------------|----------------------------------------|-----------------|-----------------|-----------------|
|      |                                       | Without additional<br>parametrisation  | HMR             | WYF             | HMR + WYF       |
| 5C7C | -7.29                                 | $-36.9 \pm 3.2$                        | $-36.3 \pm 4.5$ | $-32.7 \pm 5.8$ | $-34.8 \pm 3.9$ |
| 5M6M | -10.20                                | $-38.4 \pm 8.0$                        | $-43.0 \pm 4.0$ | $-42.3 \pm 5.4$ | $-43.2 \pm 3.8$ |
| 5OQW | -10.26                                | $-44.8 \pm 5.2$                        | $-44.4 \pm 5.4$ | $-47.3 \pm 4.0$ | $-46.0 \pm 4.0$ |
| 5M6L | -11.49                                | $-44.4 \pm 4.4$                        | $-44.1 \pm 4.3$ | $-45.6 \pm 4.8$ | $-46.8 \pm 3.9$ |
| AVPI | -8.91                                 | $-45.6 \pm 4.9$                        | $-41.6 \pm 6.8$ | $-45.9 \pm 5.4$ | $-38.4 \pm 6.6$ |

b) with entropic term calculated using normal mode analysis of harmonic frequencies (NM) or using the interaction entropy method (IE)

**10 ns**

|      | $\Delta G_{\text{exp}}$<br>[kcal/mol] | $\Delta G_{\text{MM-PBSA}}$ [kcal/mol] |                 |                 |                 |                |                 |                |                 |
|------|---------------------------------------|----------------------------------------|-----------------|-----------------|-----------------|----------------|-----------------|----------------|-----------------|
|      |                                       | Without additional<br>parametrisation  |                 | HMR             |                 | WYF            |                 | HMR + WYF      |                 |
|      |                                       | NM                                     | IE              | NM              | IE              | NM             | IE              | NM             | IE              |
| 5C7C | -7.29                                 | $-10.4 \pm 3.1$                        | $-27.5 \pm 3.0$ | $-11.1 \pm 4.9$ | $-18.7 \pm 5.2$ | $-9.9 \pm 3.6$ | $-29.8 \pm 3.5$ | $-9.0 \pm 3.9$ | $-18.5 \pm 4.0$ |
| 5M6M | -10.20                                | $-5.1 \pm 4.4$                         | $-33.5 \pm 4.4$ | $-1.3 \pm 3.6$  | $-36.2 \pm 3.6$ | $-3.9 \pm 3.9$ | $-31.3 \pm 3.9$ | $-2.3 \pm 4.2$ | $-33.5 \pm 4.3$ |
| 5OQW | -10.26                                | $1.4 \pm 4.0$                          | $-32.9 \pm 4.1$ | $3.0 \pm 4.0$   | $-37.9 \pm 4.0$ | $-3.6 \pm 3.7$ | $-39.1 \pm 3.7$ | $-3.9 \pm 3.5$ | $-39.0 \pm 3.9$ |
| 5M6L | -11.49                                | $-3.6 \pm 4.0$                         | $-26.1 \pm 4.4$ | $-1.1 \pm 4.2$  | $-26.7 \pm 4.4$ | $-5.1 \pm 3.6$ | $-40.4 \pm 3.7$ | $-6.2 \pm 3.7$ | $-38.5 \pm 3.7$ |
| AVPI | -8.91                                 | $-4.3 \pm 5.3$                         | $-33.6 \pm 5.5$ | $0.6 \pm 7.9$   | $-23.6 \pm 8.6$ | $-5.9 \pm 5.2$ | $-31.1 \pm 5.7$ | $7.0 \pm 8.4$  | $-16.8 \pm 9.9$ |

**25 ns**

|      | $\Delta G_{\text{exp}}$<br>[kcal/mol] | $\Delta G_{\text{MM-PBSA}}$ [kcal/mol] |                  |                 |                 |                 |                 |                 |                 |
|------|---------------------------------------|----------------------------------------|------------------|-----------------|-----------------|-----------------|-----------------|-----------------|-----------------|
|      |                                       | Without additional<br>parametrisation  |                  | HMR             |                 | WYF             |                 | HMR + WYF       |                 |
|      |                                       | NM                                     | IE               | NM              | IE              | NM              | IE              | NM              | IE              |
| 5C7C | -7.29                                 | $-20.4 \pm 3.6$                        | $-26.4 \pm 3.2$  | $-18.5 \pm 5.0$ | $-15.5 \pm 4.9$ | $-12.1 \pm 5.0$ | $-19.1 \pm 5.9$ | $-16.8 \pm 4.4$ | $-18.2 \pm 4.1$ |
| 5M6M | -10.20                                | $-9.5 \pm 8.2$                         | $-7.81 \pm 10.4$ | $-18.2 \pm 4.3$ | $-34.0 \pm 4.0$ | $-14.0 \pm 6.3$ | $-15.2 \pm 6.6$ | $-8.2 \pm 3.9$  | $-33.0 \pm 4.2$ |
| 5OQW | -10.26                                | $-16.7 \pm 6.0$                        | $-27.5 \pm 5.6$  | $-13.9 \pm 5.7$ | $-23.7 \pm 6.0$ | $-19.4 \pm 4.3$ | $-34.4 \pm 4.1$ | $-19.1 \pm 4.3$ | $-33.7 \pm 4.0$ |
| 5M6L | -11.49                                | $-18.0 \pm 4.7$                        | $-21.8 \pm 5.2$  | $-17.7 \pm 4.6$ | $-26.5 \pm 4.5$ | $-20.2 \pm 5.3$ | $-29.6 \pm 5.0$ | $-22.4 \pm 4.3$ | $-25.2 \pm 4.1$ |
| AVPI | -8.91                                 | $-19.4 \pm 5.4$                        | $-33.3 \pm 5.1$  | $-12.7 \pm 7.1$ | $-22.7 \pm 7.3$ | $-19.0 \pm 5.9$ | $-26.1 \pm 6.0$ | $-9.8 \pm 6.8$  | $-19.6 \pm 7.4$ |
